# Supplementary material
Source: HighWire-hosted journal article supplement (https://bmjopen.bmj.com/content/11/9/e054263)
Supplement: inline-supplementary-material-1 [file inline-supplementary-material-1.pdf]

**Supplemental Table 1. Unweighted number and weighted percentage of participant characteristics among children aged 3-17 years who were included in the analytical sample and those excluded due to missing data on household food insufficiency and current depression or anxiety.**

|                                                      | Analytical dataset for current depression |                         |                    |                         | Analytical dataset for current anxiety |                         |                    |                         |
|------------------------------------------------------|-------------------------------------------|-------------------------|--------------------|-------------------------|----------------------------------------|-------------------------|--------------------|-------------------------|
|                                                      | Included (n=86,427) <sup>a</sup>          |                         | Excluded (n=2,085) |                         | Included (n=86,292) <sup>a</sup>       |                         | Excluded (n=2,220) |                         |
|                                                      | Unweighted N                              | Weighted % <sup>b</sup> | Unweighted N       | Weighted % <sup>b</sup> | Unweighted N                           | Weighted % <sup>b</sup> | Unweighted N       | Weighted % <sup>b</sup> |
| <b>Child's age, year</b>                             |                                           |                         |                    |                         |                                        |                         |                    |                         |
| 3-5                                                  | 15057                                     | 19.4                    | 345                | 18.7                    | 15059                                  | 19.4                    | 343                | 18.4                    |
| 6-11                                                 | 30216                                     | 40.3                    | 690                | 37.6                    | 30174                                  | 40.3                    | 732                | 39.2                    |
| 12-17                                                | 41154                                     | 40.2                    | 1050               | 43.7                    | 41059                                  | 40.3                    | 1145               | 42.4                    |
| <b>Child's sex</b>                                   |                                           |                         |                    |                         |                                        |                         |                    |                         |
| Boys                                                 | 44579                                     | 51.0                    | 1069               | 53.1                    | 44523                                  | 51.1                    | 1125               | 51.6                    |
| Girls                                                | 41848                                     | 49.0                    | 1016               | 46.9                    | 41769                                  | 48.9                    | 1095               | 48.4                    |
| <b>Child's race/ethnicity</b>                        |                                           |                         |                    |                         |                                        |                         |                    |                         |
| Non-Hispanic White                                   | 60347                                     | 51.1                    | 1264               | 39.7                    | 60223                                  | 51.1                    | 1388               | 40.3                    |
| Hispanic                                             | 9753                                      | 25.1                    | 291                | 27.8                    | 9746                                   | 25.1                    | 298                | 28.0                    |
| Non-Hispanic Black                                   | 5304                                      | 13.4                    | 229                | 22.0                    | 5304                                   | 13.4                    | 229                | 21.5                    |
| Other                                                | 11023                                     | 10.4                    | 301                | 10.5                    | 11019                                  | 10.4                    | 305                | 10.3                    |
| <b>Geographical region</b>                           |                                           |                         |                    |                         |                                        |                         |                    |                         |
| Northeast                                            | 21552                                     | 21.2                    | 452                | 17.9                    | 21511                                  | 21.2                    | 493                | 18.7                    |
| Midwest                                              | 15821                                     | 15.9                    | 396                | 18.7                    | 15788                                  | 16.0                    | 429                | 17.6                    |
| South                                                | 27328                                     | 38.7                    | 714                | 41.6                    | 27291                                  | 38.7                    | 751                | 40.8                    |
| West                                                 | 21726                                     | 24.2                    | 523                | 21.9                    | 21702                                  | 24.2                    | 547                | 22.9                    |
| <b>Child's health insurance type</b>                 |                                           |                         |                    |                         |                                        |                         |                    |                         |
| Any public                                           | 19507                                     | 37.7                    | 540                | 42.8                    | 19462                                  | 37.6                    | 585                | 44.4                    |
| Private only                                         | 62865                                     | 62.3                    | 1204               | 57.2                    | 62777                                  | 62.4                    | 1292               | 55.6                    |
| Missing/uninsured                                    | 4055                                      | 7.7                     | 341                | 21.2                    | 4053                                   | 7.7                     | 343                | 19.8                    |
| <b>Household poverty, % of federal poverty level</b> |                                           |                         |                    |                         |                                        |                         |                    |                         |
| 0-99                                                 | 7647                                      | 17.7                    | 213                | 19.4                    | 7634                                   | 17.7                    | 226                | 20.3                    |
| 100-199                                              | 14236                                     | 24.0                    | 642                | 34.3                    | 14217                                  | 24.0                    | 661                | 34.6                    |

|                                                                        |       |      |     |      |       |      |     |      |
|------------------------------------------------------------------------|-------|------|-----|------|-------|------|-----|------|
| 200-399                                                                | 31372 | 30.8 | 938 | 38.5 | 31321 | 30.9 | 989 | 36.3 |
| ≥400                                                                   | 33172 | 27.5 | 292 | 7.7  | 33120 | 27.5 | 344 | 8.8  |
| <b>Family structure</b>                                                |       |      |     |      |       |      |     |      |
| 2 parents, married                                                     | 62086 | 65.5 | 605 | 47.2 | 61977 | 65.5 | 714 | 48.6 |
| 2 parents, unmarried                                                   | 5341  | 8.2  | 142 | 13.0 | 5340  | 8.2  | 143 | 13.7 |
| Single or other                                                        | 18433 | 26.3 | 419 | 39.8 | 18406 | 26.3 | 446 | 37.7 |
| <b>Parental/primary caregiver's mental and emotional health status</b> |       |      |     |      |       |      |     |      |
| Fair or poor                                                           | 3564  | 4.8  | 85  | 16.4 | 3555  | 4.8  | 94  | 14.5 |
| Good                                                                   | 14908 | 18.0 | 172 | 19.3 | 14865 | 18.0 | 215 | 18.6 |
| Excellent or very good                                                 | 67033 | 77.2 | 742 | 64.3 | 66948 | 77.2 | 827 | 66.9 |

<sup>a</sup>The sample sizes for the analytical dataset for depression (n=86,427) and anxiety (n=86,292) were slightly different due to different levels of missing data in depression and anxiety.

<sup>b</sup>All percentages were calculated with weighted data to reflect the national representative prevalence in the target U.S. population.

**Supplemental Table 2. Crude and adjusted odds ratio (95% CI) of current depression and anxiety in association with household food insufficiency and other major risk factors among US children aged 6 to 17 years, National Survey of Children's Health (2016-2018)**

| Characteristic                                       | Current depression (n=71,370) |                       | Current anxiety (n=71,233) |                       |
|------------------------------------------------------|-------------------------------|-----------------------|----------------------------|-----------------------|
|                                                      | Crude                         | Adjusted <sup>a</sup> | Crude                      | Adjusted <sup>a</sup> |
| <b>Household food insufficiency</b>                  |                               |                       |                            |                       |
| No                                                   | 1 [Reference]                 | 1 [Reference]         | 1 [Reference]              | 1 [Reference]         |
| Yes                                                  | 2.98 (2.39, 3.71)             | 1.57 (1.20, 2.06)     | 2.18 (1.81, 2.63)          | 1.57 (1.28, 1.93)     |
| <b>Child's age, year</b>                             |                               |                       |                            |                       |
| 6-11                                                 | 1 [Reference]                 | 1 [Reference]         | 1 [Reference]              | 1 [Reference]         |
| 12-17                                                | 3.65 (3.02, 4.41)             | 3.80 (3.15, 4.59)     | 1.60 (1.44, 1.78)          | 1.63 (1.47, 1.81)     |
| <b>Child's sex</b>                                   |                               |                       |                            |                       |
| Boys                                                 | 1 [Reference]                 | 1 [Reference]         | 1 [Reference]              | 1 [Reference]         |
| Girls                                                | 1.24 (1.08, 1.43)             | 1.23 (1.06, 1.43)     | 1.14 (1.03, 1.26)          | 1.14 (1.03, 1.27)     |
| <b>Child's race/ethnicity</b>                        |                               |                       |                            |                       |
| Non-Hispanic White                                   | 1 [Reference]                 | 1 [Reference]         | 1 [Reference]              | 1 [Reference]         |
| Hispanic                                             | 0.59 (0.48, 0.74)             | 0.50 (0.40, 0.63)     | 0.56 (0.48, 0.67)          | 0.54 (0.45, 0.64)     |
| Non-Hispanic Black                                   | 0.99 (0.79, 1.26)             | 0.59 (0.45, 0.77)     | 0.47 (0.38, 0.57)          | 0.34 (0.28, 0.43)     |
| Other                                                | 0.77 (0.61, 0.98)             | 0.71 (0.55, 0.91)     | 0.56 (0.47, 0.66)          | 0.52 (0.44, 0.62)     |
| <b>Geographical region</b>                           |                               |                       |                            |                       |
| Northeast                                            | 1 [Reference]                 | 1 [Reference]         | 1 [Reference]              | 1 [Reference]         |
| Midwest                                              | 1.32 (1.06, 1.66)             | 1.17 (0.93, 1.48)     | 1.10 (0.96, 1.26)          | 1.00 (0.87, 1.15)     |
| South                                                | 1.05 (0.84, 1.32)             | 1.01 (0.79, 1.28)     | 0.89 (0.77, 1.02)          | 0.92 (0.80, 1.06)     |
| West                                                 | 0.87 (0.67, 1.12)             | 0.96 (0.74, 1.26)     | 0.77 (0.66, 0.91)          | 0.82 (0.70, 0.97)     |
| <b>Child's health insurance type</b>                 |                               |                       |                            |                       |
| Any public                                           | 1 [Reference]                 | 1 [Reference]         | 1 [Reference]              | 1 [Reference]         |
| Private only                                         | 0.45 (0.39, 0.52)             | 0.45 (0.37, 0.54)     | 0.70 (0.63, 0.78)          | 0.55 (0.48, 0.64)     |
| Missing/uninsured                                    | 0.48 (0.34, 0.66)             | 0.50 (0.36, 0.71)     | 0.61 (0.46, 0.80)          | 0.58 (0.44, 0.78)     |
| <b>Household poverty, % of federal poverty level</b> |                               |                       |                            |                       |
| 0-99                                                 | 1 [Reference]                 | 1 [Reference]         | 1 [Reference]              | 1 [Reference]         |
| 100-199                                              | 0.72 (0.57, 0.90)             | 0.95 (0.75, 1.20)     | 1.00 (0.83, 1.20)          | 1.21 (0.99, 1.48)     |
| 200-399                                              | 0.54 (0.44, 0.66)             | 1.07 (0.84, 1.35)     | 1.00 (0.84, 1.18)          | 1.57 (1.27, 1.95)     |

|                                                                        |                   |                   |                   |                   |
|------------------------------------------------------------------------|-------------------|-------------------|-------------------|-------------------|
| ≥400                                                                   | 0.57 (0.46, 0.70) | 1.46 (1.11, 1.92) | 1.03 (0.87, 1.21) | 1.89 (1.51, 2.37) |
| <b>Family structure</b>                                                |                   |                   |                   |                   |
| 2 parents, married                                                     | 1 [Reference]     | 1 [Reference]     | 1 [Reference]     | 1 [Reference]     |
| 2 parents, unmarried                                                   | 1.82 (1.35, 2.45) | 1.42 (1.06, 1.92) | 1.20 (0.97, 1.49) | 1.12 (0.89, 1.39) |
| Single or other                                                        | 2.26 (1.95, 2.62) | 1.53 (1.28, 1.83) | 1.42 (1.28, 1.58) | 1.29 (1.13, 1.46) |
| <b>Parental/primary caregiver's mental and emotional health status</b> |                   |                   |                   |                   |
| Fair or poor                                                           | 1 [Reference]     | 1 [Reference]     | 1 [Reference]     | 1 [Reference]     |
| Good                                                                   | 0.50 (0.40, 0.63) | 0.60 (0.47, 0.76) | 0.51 (0.41, 0.62) | 0.50 (0.41, 0.62) |
| Excellent or very good                                                 | 0.15 (0.12, 0.19) | 0.20 (0.16, 0.26) | 0.20 (0.17, 0.25) | 0.21 (0.17, 0.26) |

<sup>a</sup>Adjusted for all other variables in the table.

**Supplemental Table 3. Sensitivity analysis: Adjusted odds ratio (95% CI) of current depression and anxiety in association with household food insufficiency and other risk factors including child's obesity status<sup>a,b</sup>**

|                                                                        | Current depression<br>(n = 49,712) | Current anxiety<br>(n = 49,614) |
|------------------------------------------------------------------------|------------------------------------|---------------------------------|
| <b>Household food insufficiency</b>                                    |                                    |                                 |
| No                                                                     | 1 [Reference]                      | 1 [Reference]                   |
| Yes                                                                    | 1.44 (1.09, 1.91)                  | 1.38 (1.09, 1.76)               |
| <b>Child's age, year</b>                                               |                                    |                                 |
| 10-11                                                                  | 0.38 (0.30, 0.49)                  | 0.78 (0.67, 0.91)               |
| 12-17                                                                  | 1 [Reference]                      | 1 [Reference]                   |
| <b>Child's sex</b>                                                     |                                    |                                 |
| Boys                                                                   | 1 [Reference]                      | 1 [Reference]                   |
| Girls                                                                  | 1.41 (1.21, 1.66)                  | 1.34 (1.20, 1.50)               |
| <b>Child's race/ethnicity</b>                                          |                                    |                                 |
| Non-Hispanic White                                                     | 1 [Reference]                      | 1 [Reference]                   |
| Hispanic                                                               | 0.51 (0.40, 0.65)                  | 0.52 (0.43, 0.63)               |
| Non-Hispanic Black                                                     | 0.53 (0.38, 0.73)                  | 0.29 (0.23, 0.38)               |
| Other                                                                  | 0.63 (0.49, 0.82)                  | 0.48 (0.40, 0.57)               |
| <b>Geographical region</b>                                             |                                    |                                 |
| Northeast                                                              | 1 [Reference]                      | 1 [Reference]                   |
| Midwest                                                                | 1.18 (0.92, 1.50)                  | 1.04 (0.89, 1.21)               |
| South                                                                  | 1.03 (0.80, 1.32)                  | 0.95 (0.81, 1.11)               |
| West                                                                   | 1.00 (0.76, 1.33)                  | 0.91 (0.75, 1.11)               |
| <b>Child's insurance type</b>                                          |                                    |                                 |
| Any public                                                             | 1 [Reference]                      | 1 [Reference]                   |
| Private only                                                           | 0.51 (0.41, 0.62)                  | 0.57 (0.49, 0.67)               |
| Missing/uninsured                                                      | 0.47 (0.33, 0.68)                  | 0.57 (0.40, 0.80)               |
| <b>Household poverty, % of federal poverty level</b>                   |                                    |                                 |
| 0-99                                                                   | 1 [Reference]                      | 1 [Reference]                   |
| 100-199                                                                | 1.12 (0.86, 1.47)                  | 1.09 (0.85, 1.39)               |
| 200-399                                                                | 1.27 (0.98, 1.66)                  | 1.38 (1.08, 1.76)               |
| ≥400                                                                   | 1.78 (1.30, 2.44)                  | 1.86 (1.43, 2.42)               |
| <b>Family structure</b>                                                |                                    |                                 |
| 2 Parents, married                                                     | 1 [Reference]                      | 1 [Reference]                   |
| 2 Parents, unmarried                                                   | 1.28 (0.95, 1.74)                  | 0.91 (0.71, 1.15)               |
| Single or other                                                        | 1.56 (1.29, 1.88)                  | 1.32 (1.14, 1.53)               |
| <b>Parental/primary caregiver's mental and emotional health status</b> |                                    |                                 |
| Fair or poor                                                           | 1 [Reference]                      | 1 [Reference]                   |
| Good                                                                   | 0.59 (0.45, 0.77)                  | 0.62 (0.49, 0.78)               |
| Excellent or very good                                                 | 0.21 (0.16, 0.28)                  | 0.26 (0.21, 0.32)               |
| <b>Child's body mass index, kg/m<sup>2</sup></b>                       |                                    |                                 |
| <18.5                                                                  | 1.04 (0.74, 1.47)                  | 1.00 (0.81, 1.23)               |
| 18.5-24.9                                                              | 1 [Reference]                      | 1 [Reference]                   |
| 25.0-29.9                                                              | 1.27 (1.02, 1.59)                  | 1.19 (1.00, 1.41)               |
| ≥30.0                                                                  | 1.81 (1.47, 2.22)                  | 1.39 (1.18, 1.64)               |

<sup>a</sup>Adjusted for all other variables listed in the table.

<sup>b</sup>Restricted to children aged 10-17 years due to data availability of child's body mass index among this age group but not among those younger in the National Survey of Children's Health.

**Supplemental Table 4. Age-stratified crude and adjusted odds ratio (95% CI) of current depression and anxiety in association with household food insufficiency among US children aged 3 to 17 years, National Survey of Children's Health (2016-2018)**

|                              | OR (95% CI) of depression |                      |                      |                   |                      |                      |
|------------------------------|---------------------------|----------------------|----------------------|-------------------|----------------------|----------------------|
|                              | 3-11 years                |                      |                      | 12-17 years       |                      |                      |
|                              | Crude                     | Model 1 <sup>a</sup> | Model 2 <sup>b</sup> | Crude             | Model 1 <sup>a</sup> | Model 2 <sup>b</sup> |
| Household food sufficiency   | 1 [reference]             | 1 [reference]        | 1 [reference]        | 1 [reference]     | 1 [reference]        | 1 [reference]        |
| Household food insufficiency | 4.24 (2.62, 6.85)         | 2.46 (1.48, 4.11)    | 1.78 (1.02, 3.11)    | 2.59 (2.03, 3.29) | 2.02 (1.54, 2.65)    | 1.47 (1.09, 1.98)    |
|                              | OR (95% CI) of anxiety    |                      |                      |                   |                      |                      |
|                              | 3-11 years                |                      |                      | 12-17 years       |                      |                      |
|                              | Crude                     | Model 1 <sup>a</sup> | Model 2 <sup>b</sup> | Crude             | Model 1 <sup>a</sup> | Model 2 <sup>b</sup> |
| Household food sufficiency   | 1 [reference]             | 1 [reference]        | 1 [reference]        | 1 [reference]     | 1 [reference]        | 1 [reference]        |
| Household food insufficiency | 2.32 (1.75, 3.07)         | 2.17 (1.60, 2.94)    | 1.53 (1.13, 2.06)    | 1.99 (1.57, 2.51) | 2.02 (1.57, 2.60)    | 1.56 (1.19, 2.02)    |

<sup>a</sup>Adjusted for child's age, sex, race/ethnicity, geographical region, health insurance type, household poverty status, family structure, and parental/primary caregiver's mental and emotional health status.

<sup>b</sup>Adjusted for all covariates in Model 1 and parental/primary caregiver's mental and emotional health status.
